# Supplementary material
Source: publisher figshare collection journal article supplement (https://acs.figshare.com/ndownloader/files/4538608)
Supplement: Supplementary file 1 [file 4538608]

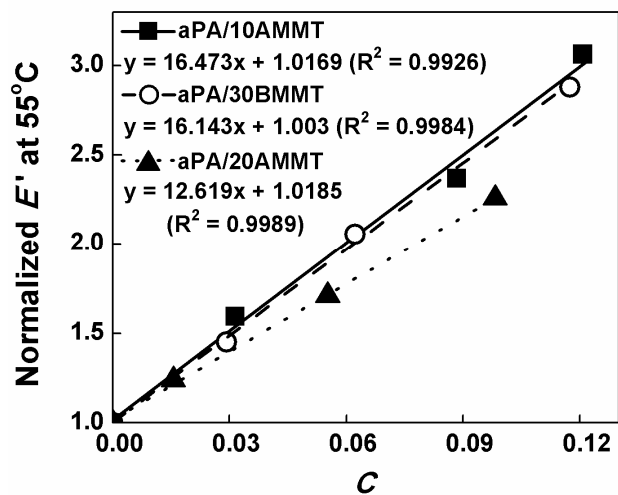

**Figure 1.** The normalized  $E'$  at 55°C of aPA/organoclay nanocomposites as a function of calculated  $C$ .

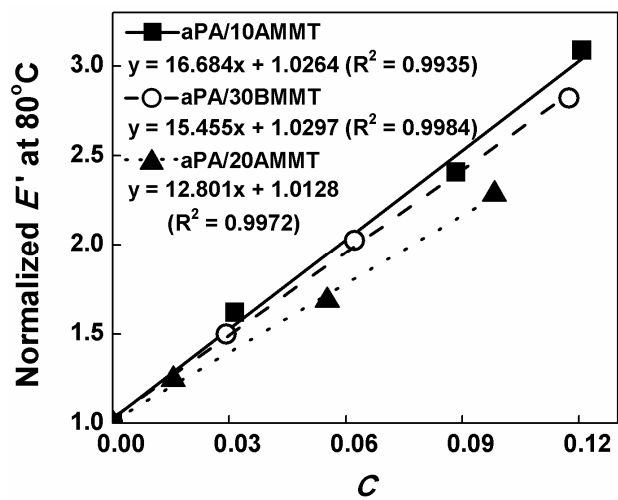

**Figure 2.** The normalized  $E'$  at 80°C of aPA/organoclay nanocomposites as a function of calculated  $C$ .
